# Supplementary material
Source: PubMed Central journal article supplement (PMC7066596)
Supplement: NIHMS1066999-supplement-Supplement.pdf [file NIHMS1066999-supplement-Supplement.pdf]

1 SUPPLEMENTAL DATA

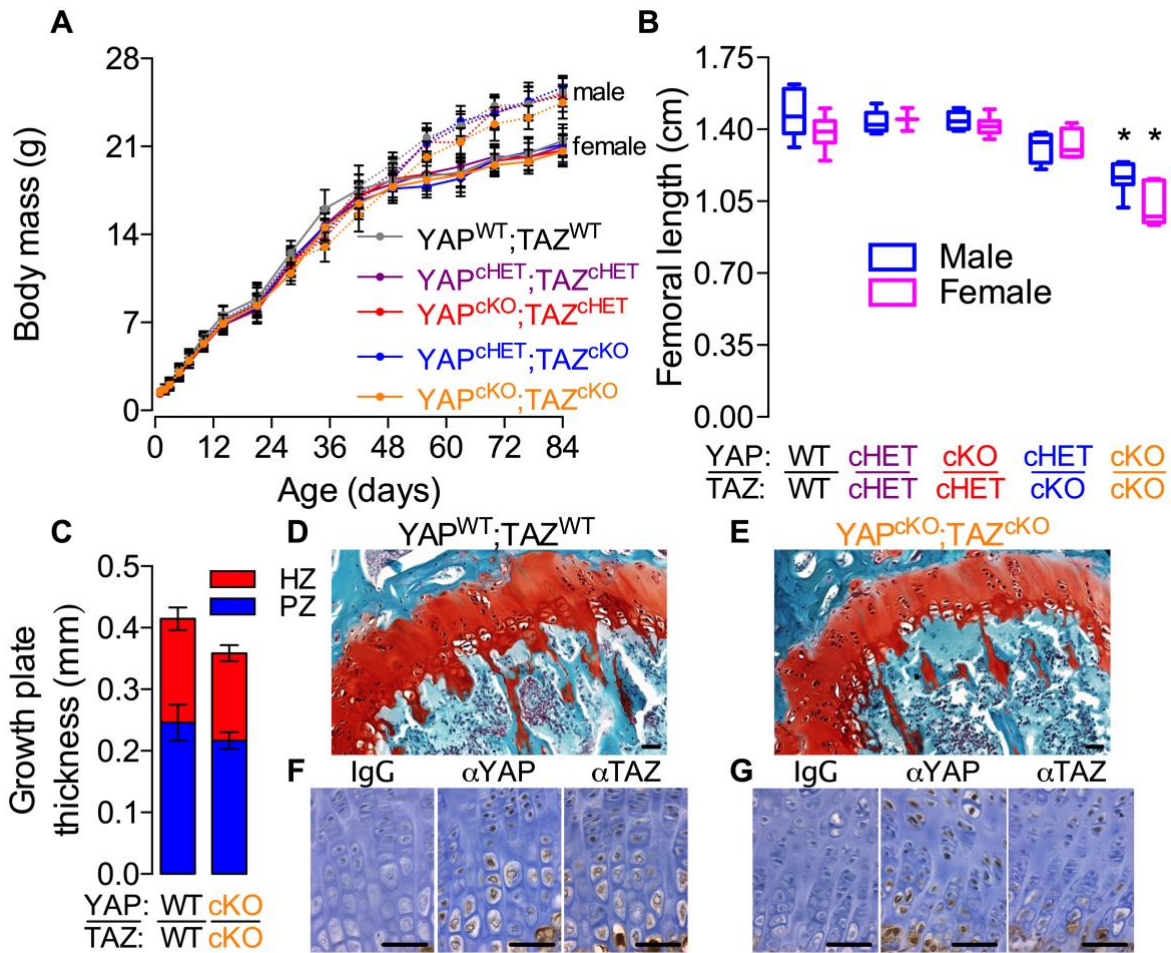

2

3 **Supplemental Fig. 1. Combinatorial YAP/TAZ ablation with 8kb-DMP1-Cre is functionally redundant and**  
 4 **does not recombine in growth plate chondrocytes. A)** Body masses from mice with allele-dose dependent  
 5 YAP/TAZ ablation from DMP1-expressing cells until P84. **B)** Femoral lengths from mice with allele-dose  
 6 dependent YAP/TAZ ablation from DMP1-expressing cells at P84 for both males and females. **C)**  
 7 Histomorphometric quantification of P84 growth plate thickness. HZ = hypertrophic zone. PZ = proliferating  
 8 zone. **D)** Representative micrograph of P84 wild type (YAP<sup>WT</sup>;TAZ<sup>WT</sup>) growth plate. **E)** Representative  
 9 micrograph of P84 conditional double knockout (YAP<sup>cKO</sup>;TAZ<sup>cKO</sup>) growth plate. **F)** Representative micrographs  
 10 of chondrocyte immunostaining for IgG control, YAP, and TAZ in YAP<sup>WT</sup>;TAZ<sup>WT</sup> femurs at P28. **G)**  
 11 Representative micrographs of growth plate chondrocyte immunostaining for IgG control, YAP, and TAZ in  
 12 YAP<sup>cKO</sup>;TAZ<sup>cKO</sup> femurs at P28. Body mass data presented as mean with lines corresponding to the standard error  
 13 of the mean (SEM). Sample sizes, N = 6-22 per sex per group. Femoral length data presented as a box and  
 14 whiskers plots with whiskers corresponding to maximum and minimum values. Sample sizes, N = 2-10 per sex  
 15 per group. Growth plate thickness percentage data presented as bars with lines corresponding to the mean and  
 16 standard error of the mean (SEM). Sample sizes, N = 6 per group. Scale bars equal 50 μm in all images.

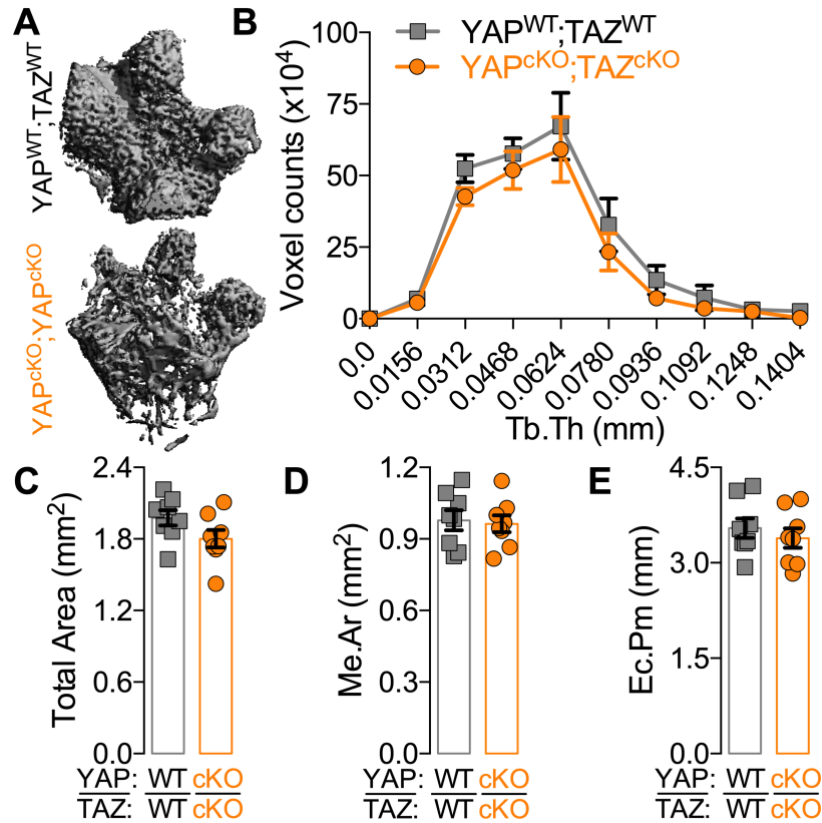

**Supplemental Fig. 2. YAP/TAZ ablation from DMP1-expressing cells altered bone microarchitecture. A)** Representative microCT reconstructions of distal metaphyseal microarchitecture in P84 femurs. **B)** Quantification of trabecular thickness distributions in cancellous bone. **C-E)** Quantification of cortical microarchitectural properties: **(C)** total area, **(D)** medullary area (Me.Ar), and **(E)** endocortical perimeter (Ec.Pm). Data are presented as bars and individual samples with lines corresponding to the mean and standard error of the mean (SEM). Sample sizes, N = 8 per group.

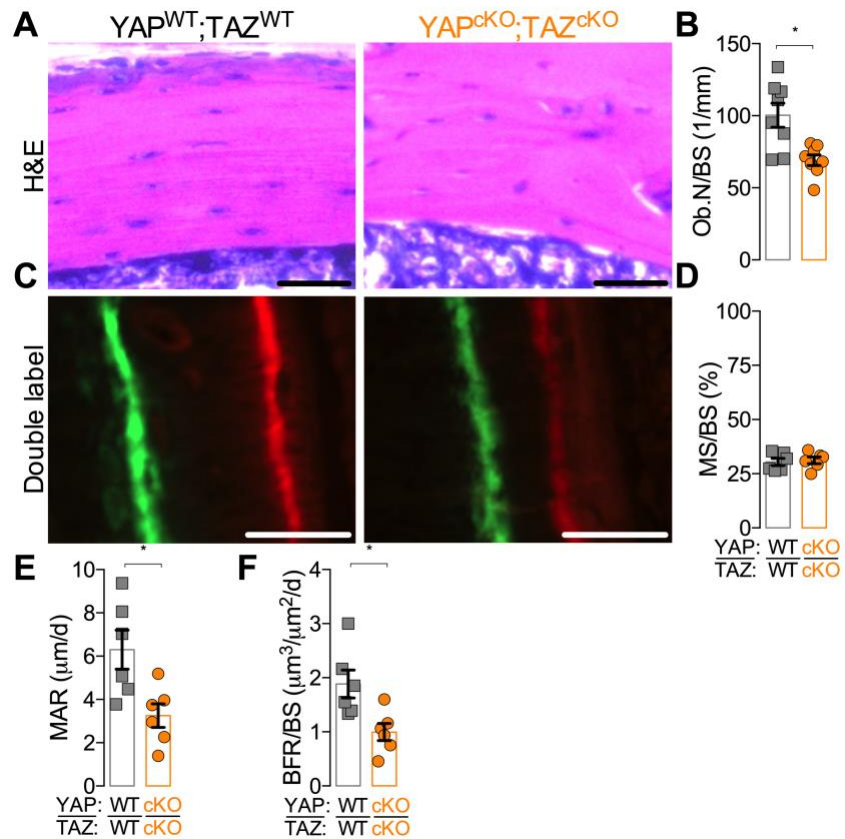

**Supplemental Fig. 3. YAP/TAZ ablation from DMP1-expressing cells altered cortical osteoblast number and function.** A) Representative micrographs of P84 cancellous metaphyseal bone stained by H+E. B) Quantification of osteoblast number per bone surface (Ob.N/BS). C) Representative micrographs of double flouochrome labeled cortical bone in P28 femurs. D-F) Quantification of (D) mineralizing surface percentage (MS/BS), (E) mineral apposition rate (MAR) and (F) bone formation rate (BFR/BS). Data are presented as bars and individual samples with lines corresponding to the mean and standard error of the mean (SEM). Sample sizes N = 6-8. Scale bars indicate 50 μm in all images.

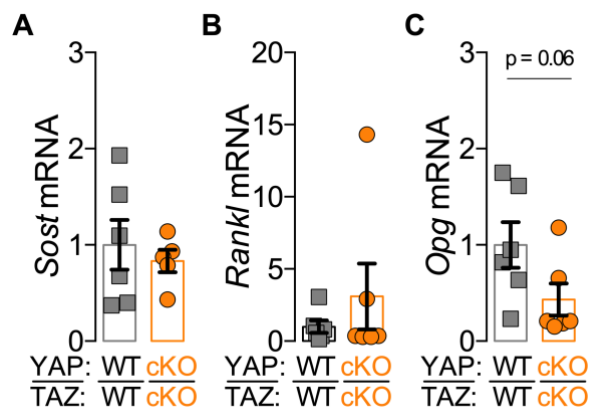

**Supplemental Fig. 4. YAP/TAZ ablation from DMP1-expressing cells did not affect bone turnover**

**markers.** A-C) Femoral bone preparations from P84 mice were harvested to quantify mRNA expression.

Expression levels, normalized to *18S rRNA*, were evaluated for (A) sclerostin (*Sost*), (B) receptor activator of

nuclear factor kappa-B ligand (*Rankl*), and (C) osteoprotegerin (*Opg*), Data are presented as bars and individual

samples with lines corresponding to the mean and standard error of the mean (SEM). Sample sizes, N = 5-6 per

group.

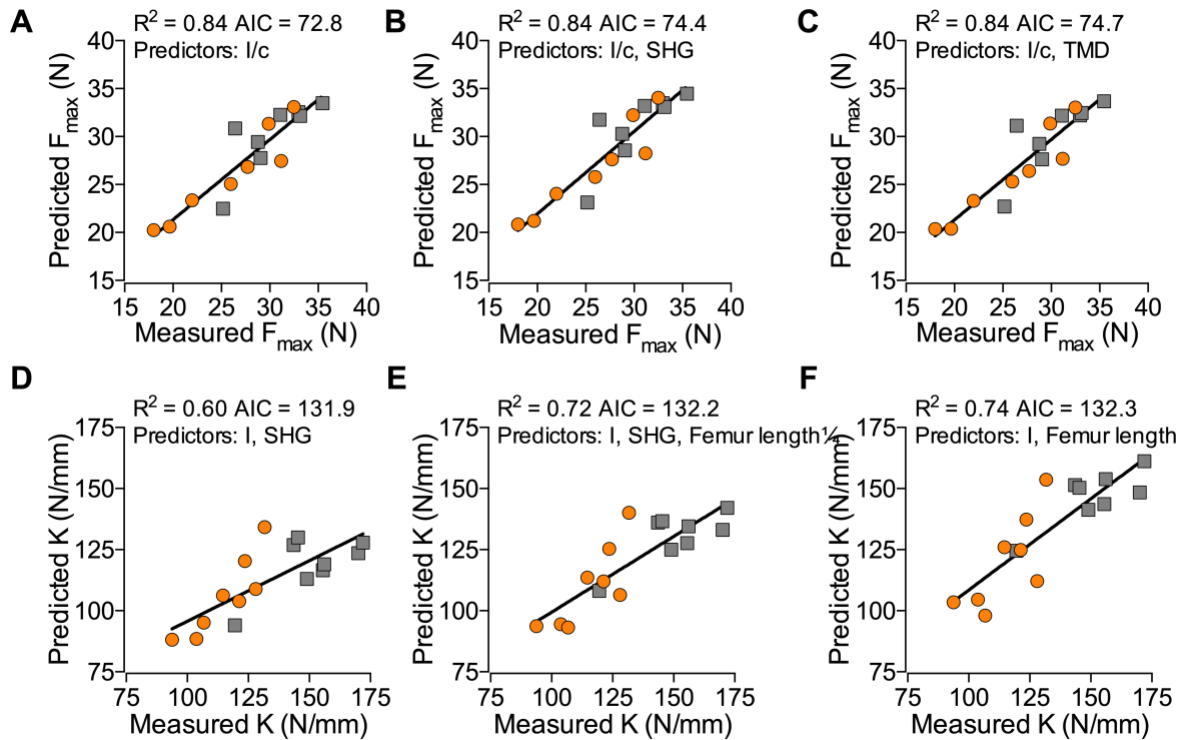

**Supplemental Fig. 5. Best subsets analysis on morphological parameters from YAP/TAZ ablation in DMP1-expressing cells demonstrated increased goodness of fit for stiffness by accounting for collagen content and organization.** Using the femurs that were scanned by microCT, tested in three-point bending, and imaged using SHG, experimental ultimate load ( $F_{max}$ ) values were compared with predicted values from the top three “best” multivariate models in order from left to right. Models were ranked based on their relative Akaike’s information criterion (AIC) value with the lowest AIC being the “best.” The three “best” multivariate models for ultimate load were **A**) only section modulus (I/c), **B**) I/c and second harmonic generated signal intensity (SHG), and **C**) I/c and tissue mineral density (TMD) as a predictors. Similarly, (K) were **D**) moment of inertia (I) and SHG, **E**) I, SHG and femur length, and **F**) I and femur length as predictors. Sample sizes, N = 8 per group.

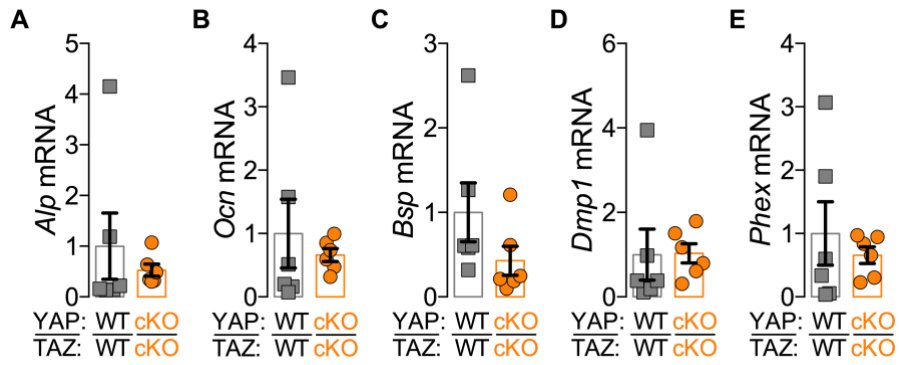

**Supplemental Fig. 6. YAP/TAZ deletion did not alter osteogenic or osteocyte-marker gene expression. A-**

**E) Femoral bone preparations from P84 mice were harvested to quantify mRNA expression. Expression levels,**

normalized to *18S rRNA*, were evaluated for **(A)** alkaline phosphatase (*Alp*), **(B)** osteocalcin (*Ocn*), **(C)** bone

sialoprotein (*Bsp*), **(D)** dentin matrix protein 1 (*Dmp1*), and **(E)** phosphate-regulating neutral endopeptidase

(*Phex*). Data are presented as bars and individual samples with lines corresponding to the mean and standard error

of the mean (SEM). Sample sizes, N = 6 per group.

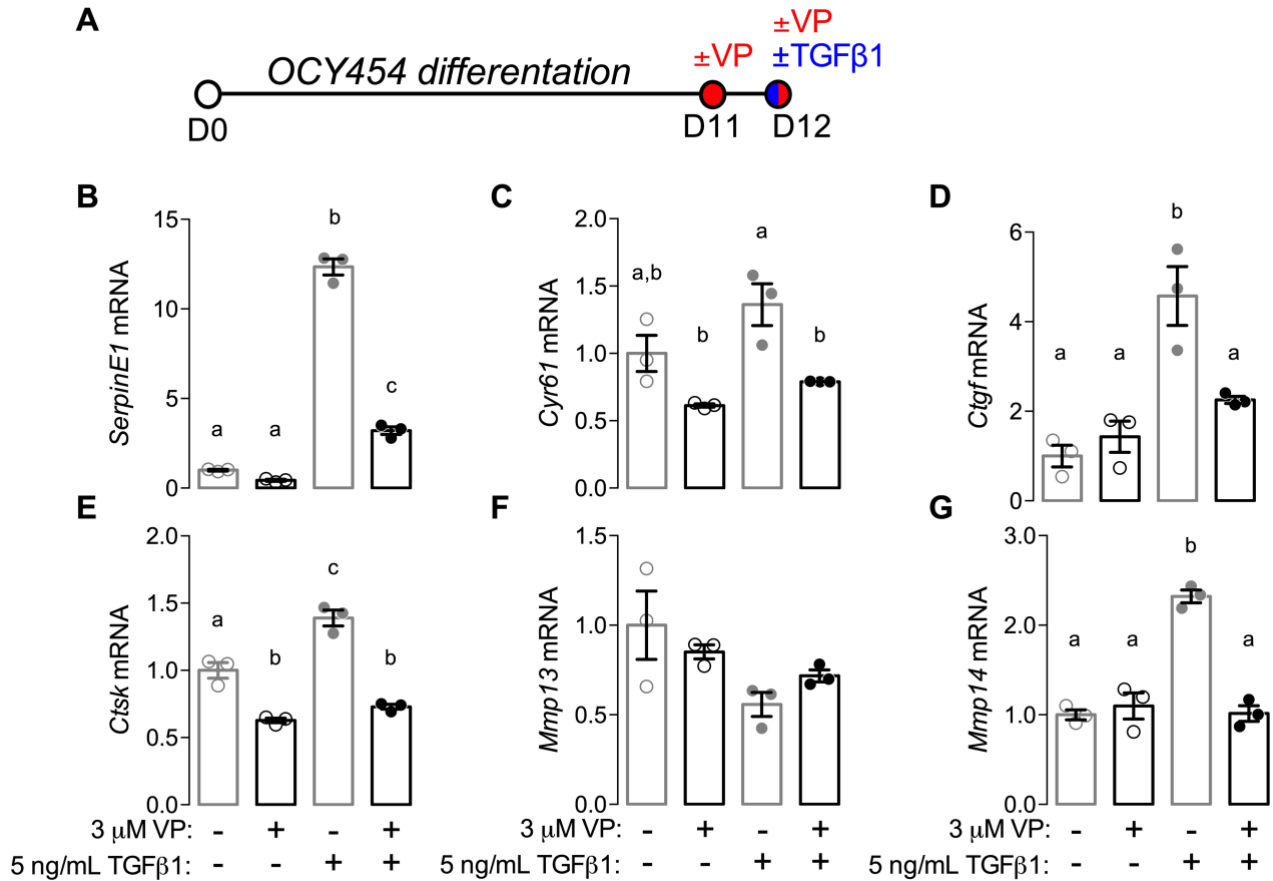

**Supplemental Fig. 7. Inhibition of YAP/TAZ-TEAD with verteporfin (VP) reduced TGF- $\beta$ -induced remodeling gene expression in OCY454 cells.** **A)** Osteocyte-like cells, OCY454, were differentiated for 12 days. Cells were combinatorially treated with inhibitor verteporfin (VP) and 5 ng/ml TGF- $\beta$ 1 at day 12. **B-G)** mRNA expression, normalized to *18S rRNA*, was evaluated for **(B)** serpin family E member 1 (*SerpinE1*), **(C)** cysteine-rich angiogenic inducer 61 (*Cyr61*), **(D)** connective tissue growth factor (*Ctgf*), **(E)** cathepsin K (*Ctsk*), **(F)** matrix metalloproteinase-13 (*Mmp13*), and **(G)** matrix metalloproteinase-14 (*Mmp14*). Relative expression was expressed as fold vs. vehicle (PBS + DMSO)-treated cells. Data are presented as bars and individual samples with lines corresponding to the mean and standard error of the mean (SEM). Sample sizes, N = 3.

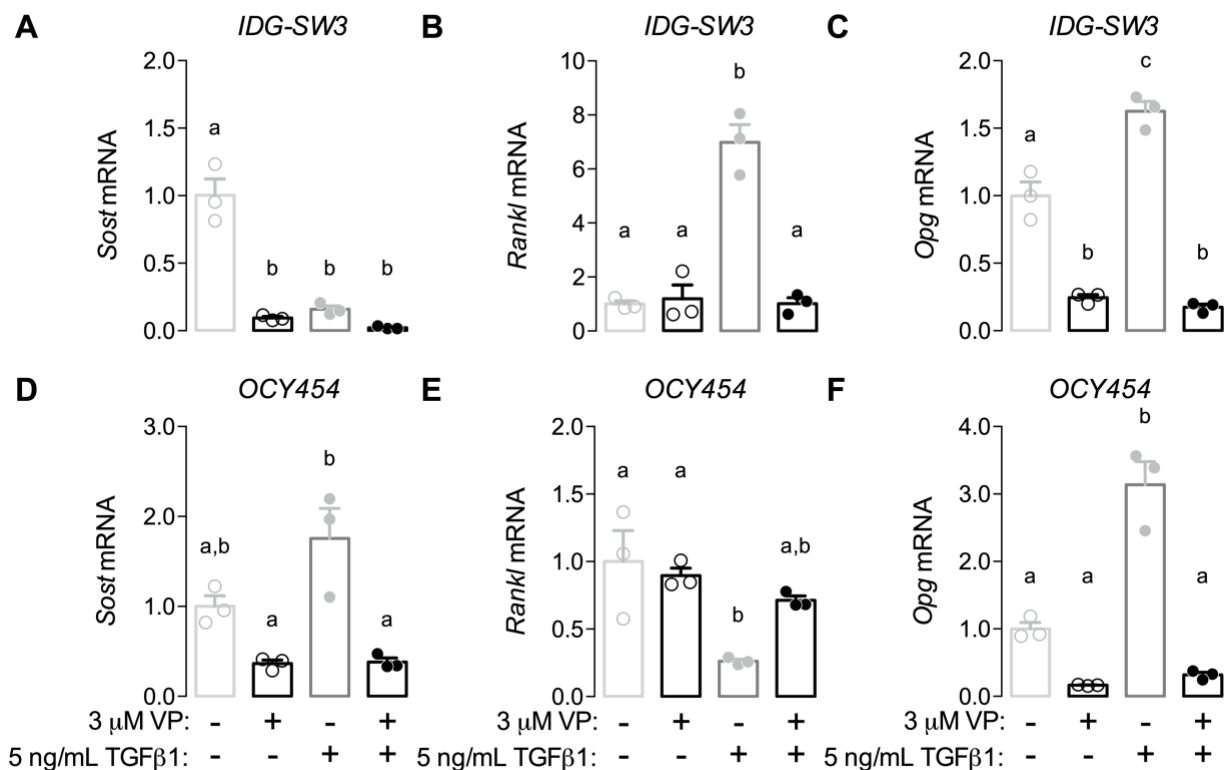

**Supplemental Fig. 8. Combinatorial verteporfin (VP) and TGF-β treatment altered bone turnover-related gene expression *in vitro*.** Osteocyte-like IDG-SW3 cells were differentiated for 21 days and combinatorially treated with inhibitor verteporfin (VP) and/or 5 ng/ml TGFβ1 at day 21. **A-C)** mRNA expression, normalized to *18S rRNA*, was evaluated for **(A)** sclerostin (*Sost*), **(B)** receptor activator of nuclear factor kappa-B ligand (*Rankl*), and **(C)** osteoprotegerin (*Opg*). Osteocyte-like cells, OCY454, were differentiated for 12 days. Cells were combinatorially treated with inhibitor verteporfin (VP) and 5 ng/ml TGF-β1 at day 12. **D-F)** mRNA expression, normalized to *18S rRNA*, was evaluated for **(D)** sclerostin (*Sost*), **(E)** receptor activator of nuclear factor kappa-B ligand (*Rankl*), and **(F)** osteoprotegerin (*Opg*). Relative expression was expressed as fold vs. vehicle (PBS + DMSO)-treated cells. Data are presented as bars and individual samples with lines corresponding to the mean and standard error of the mean (SEM). Sample sizes, N = 3.



| Gene            | Primer Sequence (5' to 3') |                                                      |
|-----------------|----------------------------|------------------------------------------------------|
| <i>18S rRNA</i> | F<br>R                     | CGAACGTCTGCCCTATCAAC<br>GGCCTCGAAAGAGTCCTGTA         |
| <i>Yap</i>      | F<br>R                     | TGGACGTGGAGTCTGTGTTG<br>AAGCGGAACAACGATGGACA         |
| <i>Taz</i>      | F<br>R                     | GTCCATCACTTCCACCTC<br>TTGACGCATCCTAATCCT             |
| <i>Coll1a1</i>  | F<br>R                     | GCTCCTCTTAGGGGCCACT<br>CCACGTCTCACCATTGGGG           |
| <i>Alp</i>      | F<br>R                     | GGACAGGACACACACACACA<br>CAAACAGGAGAGCCACTTCA         |
| <i>Ocn</i>      | F<br>R                     | TGAGCTTAACCCTGCTTGTG<br>TAGGGCAGCACAGGTCCTA          |
| <i>Bsp</i>      | F<br>R                     | ACAATCCGTGCCACTCACT<br>TTTCATCGAGAAAGCACAGG          |
| <i>Dmp1</i>     | F<br>R                     | GAACAGTGAGTCATCAGAAG<br>AAAGGTATCATCTCCACTGTC        |
| <i>Ctsk</i>     | F<br>R                     | GAGGGCCAACCTCAAGAAGAA<br>GCCGTGGCGTTATACATACA        |
| <i>Mmp13</i>    | F<br>R                     | CGGGAATCCTGAAGAAGTCTACA<br>CTAAGCCAAAGAAAGATTGCATTTC |
| <i>Mmp14</i>    | F<br>R                     | AGGAGACGGAGGTGATCATCATTG<br>GTCCCATGGCGTCTGAAGA      |
| <i>Sost</i>     | F<br>R                     | TCCTCCTGAGAACAACCAGAC<br>TGTCAGGAAGCGGGTGTAGTG       |
| <i>Phex</i>     | F<br>R                     | TCATTGATACCAGACTCTACC<br>CAATGGTTTTCTTCCTCTCG        |
| <i>Serpine1</i> | F<br>R                     | CAGATGACCACAGCGGGGAA<br>GGCATGAGCTGTGCCCTTCT         |
| <i>Opg</i>      | F<br>R                     | AGAGCAAACCTTCCAGCTGC<br>CTGCTCTGTGGTGAGGTTTCG        |
| <i>Rankl</i>    | F<br>R                     | CCAAGATCTCTAACATGACG<br>CACCATCGCTGAAGATAGT          |

128

129

130

131 **Supplemental Table 2: Post-hoc power analyses.** Power analyses for perilacunar/canalicular phenotypic  
132 results

| <b>Figure Panel</b> | <b>Parameter</b>   | <b>Power</b> |
|---------------------|--------------------|--------------|
| Figure 4C           | Stiffness          | 0.99         |
| Figure 5G           | Canalicular length | 0.99         |
| Figure 6C           | Branch length      | 0.95         |
| Figure7B            | Calcein+ lacunae   | 0.92         |
| Figure 7C           | <i>Colla1</i> mRNA | 0.74         |
| Figure7E            | CTSK+ lacunae      | 0.86         |
| Figure 7F           | <i>Ctsk</i> mRNA   | 0.96         |
| Figure7H            | MMP13+ lacunae     | 0.83         |
| Figure 7I           | <i>Mmp13</i> mRNA  | 0.99         |
| Figure7K            | MMP14+ lacunae     | 0.74         |
| Figure 7L           | <i>Mmp14</i> mRNA  | 0.83         |

133
